# Supplementary material
Source: publisher figshare collection journal article supplement (https://karger.figshare.com/ndownloader/files/30447252)
Supplement: Supplementary file 1 [file 30447252]

**Table. Prognostic analysis of different ACR categories associated with 1-year clinical outcomes stratified by age, sex, and baseline eGFR**

|  |  |  | No albuminuria | Baseline albuminuria | 3-month albuminuria | Persistent albuminuria | P for interaction |
| --- | --- | --- | --- | --- | --- | --- | --- |
| All-cause death | Male | n (%) | 23/2720(0.9) | 8/301(2.7) | 1/264(0.4) | 12/394(3.1) |  |
|  |  | Adjusted HR* (95% CI) | ref. | 2.59(1.13-5.94) | 0.34 (0.05-2.55) | 1.62(0.72-3.67) |  |
|  | Female | n (%) | 6/1018(0.6) | 3/182(1.6) | 1/187(0.5) | 7/245(2.9) |  |
|  |  | Adjusted HR* (95% CI) | ref. | 1.54 (0.29-8.10) | 0.81 (0.10-6.85) | 3.74(1.19-11.72) | 0.47 |
| Stroke recurrence | Male | n (%) | 80/2720(2.9) | 13/301(4.3) | 13/264(4.9) | 15/394(3.8) |  |
|  |  | Adjusted HR* (95% CI) | ref. | 1.31(0.72-2.39) | 1.51(0.83-2.75) | 1.17(0.65-2.10) |  |
|  | Female | n (%) | 27/1018(2.7) | 8/182(4.4) | 11/187(5.9) | 16/245(6.5) |  |
|  |  | Adjusted HR* (95% CI) | ref. | 1.24(0.53 2.91) | 2.03(0.97-4.24) | 2.28 (1.20-4.34) | 0.38 |
| Poor functional outcome | Male | n (%) | 179/2696(6.6) | 49/299(16.4) | 21/258(8.1) | 60/388(10.7) |  |
|  |  | Adjusted OR* (95% CI) | ref. | 1.89 (1.27-2.81) | 0.90(0.53-1.53) | 2.04(1.41-.94) |  |
|  | Female | n (%) | 69/1009(6.8) | 26/180(14.4) | 20/185(10.8) | 41/240(17.1) |  |
|  |  | Adjusted OR* (95% CI) | ref. | 1.27 (0.72-2.25) | 1.43(0.80-2.56) | 2.58(1.60-4.15) | 0.37 |
|  |  |  |  |  |  |  |  |
| All-cause death | Age <60 years | n (%) | 5/1598 (0.3) | 2/178(1.1) | 0/140(0.0) | 4/241(1.7) |  |
|  |  | Adjusted HR* (95% CI) | ref. | 3.92 (0.66-23.40) | - | 6.86(1.14-41.42) |  |
|  | Age ≥60 years | n (%) | 24/2140(1.1) | 9/305(3.0) | 2/311(0.6) | 15/398(3.8) |  |
|  |  | Adjusted HR* (95% CI) | ref. | 1.86(0.81-4.27) | 0.49(0.12-2.10) | 2.08(1.02-4.24) | 0.74 |
| Stroke recurrence | Age <60 years | n (%) | 34/1598(2.1) | 6/178(3.4) | 7/140(5.0) | 16/241(6.6) |  |
|  |  | Adjusted HR* (95% CI) | ref. | 1.20(0.46-3.15) | 1.95(0.85-4.45) | 2.58(1.34-4.96) |  |
|  | Age ≥60 years | n (%) | 73/2140(3.4) | 15/305(4.9) | 17/311(5.5) | 15/398(3.8) |  |
|  |  | Adjusted HR* (95% CI) | ref. | 1.37 (0.77-2.44) | 1.55(0.89-2.68) | 1.11(0.62-1.97) | 0.13 |
| Poor functional outcome | Age <60 years | n (%) | 56/1588(3.5) | 18/178(10.1) | 4/137(2.9) | 25/240(10.4) |  |
|  |  | Adjusted OR* (95% CI) | ref. | 1.99 (1.03-3.85) | 0.64(0.22-1.92) | 3.32(1.88-5.85) |  |
|  | Age ≥60 years | n (%) | 192/2117(9.1) | 57/301(18.9) | 37/306(12.1) | 76/388(19.6) |  |
|  |  | Adjusted OR* (95% CI) | ref. | 1.46(1.01-2.13) | 1.21(0.80-1.84) | 1.91(1.36-2.67) | 0.18 |
|  |  |  |  |  |  |  |  |
| All-cause death | eGFR <60 mL/min/1.73m2 | n (%) | 8/414(1.9) | 6/93(6.5) | 1/87(1.1) | 9/192(4.7) |  |
|  |  | Adjusted HR* (95% CI) | ref. | 3.37 (1.09-10.47) | 0.51(0.06-4.15) | 1.45(0.49-4.29) |  |
|  | eGFR 60~89 mL/min/1.73m2 | n (%) | 17/1808(0.9) | 3/199(1.5) | 1/209(0.5) | 9/263(3.4) |  |
|  |  | Adjusted HR* (95% CI) | ref. | 1.40(0.40-4.92) | 0.47 (0.06-3.58) | 2.67 (1.09-6.53) |  |
|  | eGFR ≥90 mL/min/1.73m2 | n (%) | 4/1416(0.3) | 2/177(1.1) | 0(0.0) | 1/157(0.6) |  |
|  |  | Adjusted HR* (95% CI) | ref. | 1.79 (0.19-17.38) | - | 2.72(0.26-28.55) | 0.89 |
| Stroke recurrence | eGFR <60 mL/min/1.73m2 | n (%) | 18/414(4.4) | 4/93(4.3) | 4/87(4.6) | 10/192(5.2) |  |
|  |  | Adjusted HR* (95% CI) | ref. | 0.70(0.23-2.17) | 0.82 (0.27-2.50) | 0.96 (0.42-2.19) |  |
|  | eGFR 60~89 mL/min/1.73m2 | n (%) | 56/1808(3.1) | 9/199(4.5) | 15/209(7.2) | 10/263(3.8) |  |
|  |  | Adjusted HR* (95% CI) | ref. | 1.50(0.73-3.07) | 2.25 (1.26-4.03) | 1.23 (0.62-2.46) |  |
|  | eGFR ≥90 mL/min/1.73m2 | n (%) | 31/1416(2.2) | 8/177(4.5) | 4/142(2.8) | 10/157(6.4) |  |
|  |  | Adjusted HR* (95% CI) | ref. | 1.91(0.81-4.50) | 1.32 (0.46-3.81) | 3.05 (1.45-6.41) | 0.23 |
| Poor functional outcome | eGFR <60 mL/min/1.73m2 | n (%) | 47/409(11.5) | 18/90(20.0) | 12/85(14.1) | 43/185(23.2) |  |
|  |  | Adjusted OR* (95% CI) | ref. | 1.16 (0.57-2.38) | 0.92(0.43-1.94) | 2.02(1.17-3.46) |  |
|  | eGFR 60~89 mL/min/1.73m2 | n (%) | 132/1787(7.4) | 30/199(15.1) | 20/203(9.9) | 38/259(14.7) |  |
|  |  | Adjusted OR* (95% CI) | ref. | 1.43(0.88-2.31) | 1.09 (0.62-1.91) | 1.88(1.21-2.93) |  |
|  | eGFR ≥90 mL/min/1.73m2 | n (%) | 66/1410(4.7) | 27/176(15.3) | 8/142(5.6) | 17/157(10.8) |  |
|  |  | Adjusted OR* (95% CI) | ref. | 2.26(1.28-4.00) | 1.27 (0.57-2.84) | 2.46(1.30-4.64) | 0.55 |

*Adjusted for age, gender, TOAST subtypes, medical history of diabetes, hypertension, coronary heart disease, atrial fibrillation, ischemic stroke, and mRS, NIHSS, and eGFR on admission.
